# Supplementary material for: Distinct Molecular Mechanisms of Altered HLA Class II Expression in Malignant Melanoma
Source: MDPI journal article supplement (doi:10.3390/cancers13153907), 2021-08-03
Supplement: s1 [file s1]

# Supplementary Material: Distinct Molecular Mechanisms of Altered HLA Class II Expression in Malignant Melanoma

Stefanie Meyer, Diana Handke, Anja Müller, Katharina Biehl, Markus Kreuz, Jürgen Bukur, Ulrike Koehl, Maria-Filothai Lazaridou, Mark Berneburg, André Steven, Chiara Massa, Barbara Seliger

**Table S1.** Primers used for PCR analysis; Primers for the expression analysis of MHC class II APM components.

| A. Primer used for qPCR analysis.                         |                      |                                         |                                             |
|-----------------------------------------------------------|----------------------|-----------------------------------------|---------------------------------------------|
| Transcription unit                                        | Name                 | Sequence                                | Annealing Temperature/Ac-<br>cession number |
| ACTB                                                      | βactin fw            | TCC TGT GGC ATC CAC GAA ACT             | 58 NM_001101.5                              |
|                                                           | βactin rev           | GAA GCA TTT GCG GTG GAC GAT             |                                             |
| GAPDH                                                     | huGAPDH fwd          | GGA CTC ATG ACC ACA GTC CAT             | 60 NM_002046.7                              |
|                                                           | huGAPDH rev          | CGG AAG GCC ATG CCA GTG AG              |                                             |
| ALAS1 tv1                                                 | ALAS1 RT fw          | TGA GAC AGA TGC TAA TGG ATG C           | 60 NM_000688.6                              |
|                                                           | ALAS1 RT rev         | CAC CGT AGG GTA ATT GAT TGC T           |                                             |
| HLA-DOA                                                   | hsHLA-DOA fwd rt     | ACC CAT GAA TTT GAT GAG GAA C           | 60 NM_002119.4                              |
|                                                           | hsHLA-DOA rev rt     | AGC CAG GTG ATA TTG ATC ACA G           |                                             |
| HLA-DOB                                                   | hsHLA-DOB fwd rt     | GGC AAA GGC TGA CTG TTA CTT C           | 60 NM_002120.4                              |
|                                                           | hsHLA-DOB rev rt     | GGT CCT CTC TGG GTA CAC TGT C           |                                             |
| CLIP tv1                                                  | hCLIP fwd qPCR       | TAT CTC CAA CAA TGA GCA AC              | 60 NM_001025159.3                           |
|                                                           | hCLIP rev qPCR       | TCT GTC ATG TTG CCA TAC TT              |                                             |
| Cathepsin S tv1                                           | cathepsin S fw rt    | CCT TAT GGC AGA GAA GAT GTC C           | 60 NM_004079.5                              |
|                                                           | cathepsin S rev rt   | CAT AGC CAA CCA CAA GTA CAC C           |                                             |
| CIITA tv2                                                 | CIITA fw realtime    | AGA AGT TCC TCG GAA GAC ACA G           | 60 NM_000246.4                              |
|                                                           | CIITA rev realtime   | TGT TGT TCT GGG ACA GAT TGA G           |                                             |
| panli-HLA II tv1                                          | pan li HLA II fw RT  | TGG ACA AAC TGA CAG TCA CCT C           | 60 NM_001025159.3                           |
|                                                           | pan li HLA II rev RT | GTC CTC TGT CAT GTT GCC ATA C           |                                             |
| HLA-DR alpha                                              | HLA-DR alpha fw rt   | AAC TGA GGA CGT TTA CGA CTG C           | 60 NM_019111.5                              |
|                                                           | HLA-DR alpha rev rt  | AAG ATG GTC CCA ATA ATG ATG C           |                                             |
| HLA-DM alpha                                              | HLA-DM alpha fw rt   | TTG ACA AAG AGT TCT GCG AGT G           | 60 NM_006120.4                              |
|                                                           | HLA-DM alpha rev rt  | TGG GTG GGA AGA GAT TAC TGA C           |                                             |
| HLA-DM beta                                               | HLA-DM beta fw rt    | CCT CTC CCA TTT AGC CTT AAC C           | 60 NM_002118.5                              |
|                                                           | HLA-DM beta rev rt   | CAC TGC AGA CAC AGA AAC CTT C           |                                             |
| B. Primers for the methylation analysis of CIITA by COBRA |                      |                                         |                                             |
| Methylation                                               | Name                 | Sequence                                | Annealing Temperature                       |
| hCIITA                                                    | hC2TA p4 cpG1 fwd    | TTA GGT AGT TGG GAT GTT ATT TTT GAT A   | 60                                          |
|                                                           | hC2TA p4 cpG1 rev    | TCC TCC CAA ACT TAC TAT ATA ACC TTA AAC | 60                                          |
|                                                           | hC2TA p4 cpG2_3 fwd  | AAG GTT ATA TAG TAA GTT TGG GAG GAT G   | 60                                          |
|                                                           | hC2TA p4 cpG2_3 rev  | TAT AAC CCA ACA AAA AAA ATA AAA CTC A   | 60                                          |

**Table S2.** Antibodies used for flow cytometric analysis of protein expression.

| A. Flow cytometry              |          |                                                |
|--------------------------------|----------|------------------------------------------------|
| Antibody                       | Clone    | Company                                        |
| Mouse IgG2a-FITC               | 7T4-1F5  | Beckman Coulter (Krefeld, Germany)             |
| HLA-ABC-FITC                   | B9.12.1  | Beckman Coulter (Krefeld, Germany)             |
| HLA-DR,DQ,DP-FITC              | Tu39     | Beckton Dickinson (Heidelberg, Germany)        |
| HLA-DR-PE                      | G46-6    | Beckton Dickinson (Heidelberg, Germany)        |
| HLA-DQ-FITC                    | Tu169    | Beckton Dickinson (Heidelberg, Germany)        |
| HLA-DP-FITC                    | HI143    | Immunostep (Salamanca, Spain)                  |
| mouse IgG2a-PE isotype control | G155-178 | Beckton Dickinson (Heidelberg, Germany)        |
| B. Immunohistochemistry        |          |                                                |
| Antibody                       | Clone    | Company                                        |
| CIITA                          | 7-1H     | Santa Cruz Biotechnology (Heidelberg, Germany) |

|        |             |                                |
|--------|-------------|--------------------------------|
| HLA-DR | LGII-612.14 | Soldano Ferrone (Boston, USA)  |
| HLA-DO | polyclonal  | Sigma-Aldrich (St. Louis, USA) |

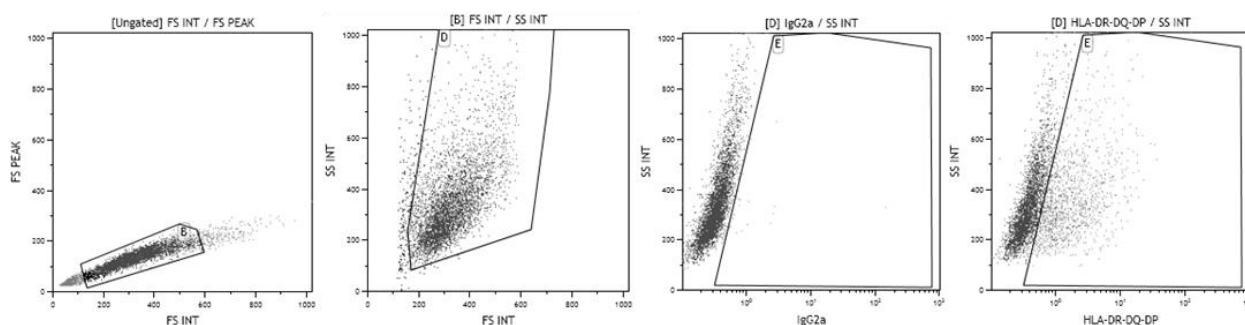

**Figure S1.** Gating strategy for the evaluation of HLA class II surface expression by melanoma cell lines. Melanoma cells were gated for single living cells based on the integral and peak value of the forward scatter (FS) and the combination of the forward and side scatter (SS), respectively. The percentage of cells expressing the antigen was obtained by setting a gate on the isotype control stained cells, whereas the mean fluorescence intensity (MFI) was calculated for the total population.

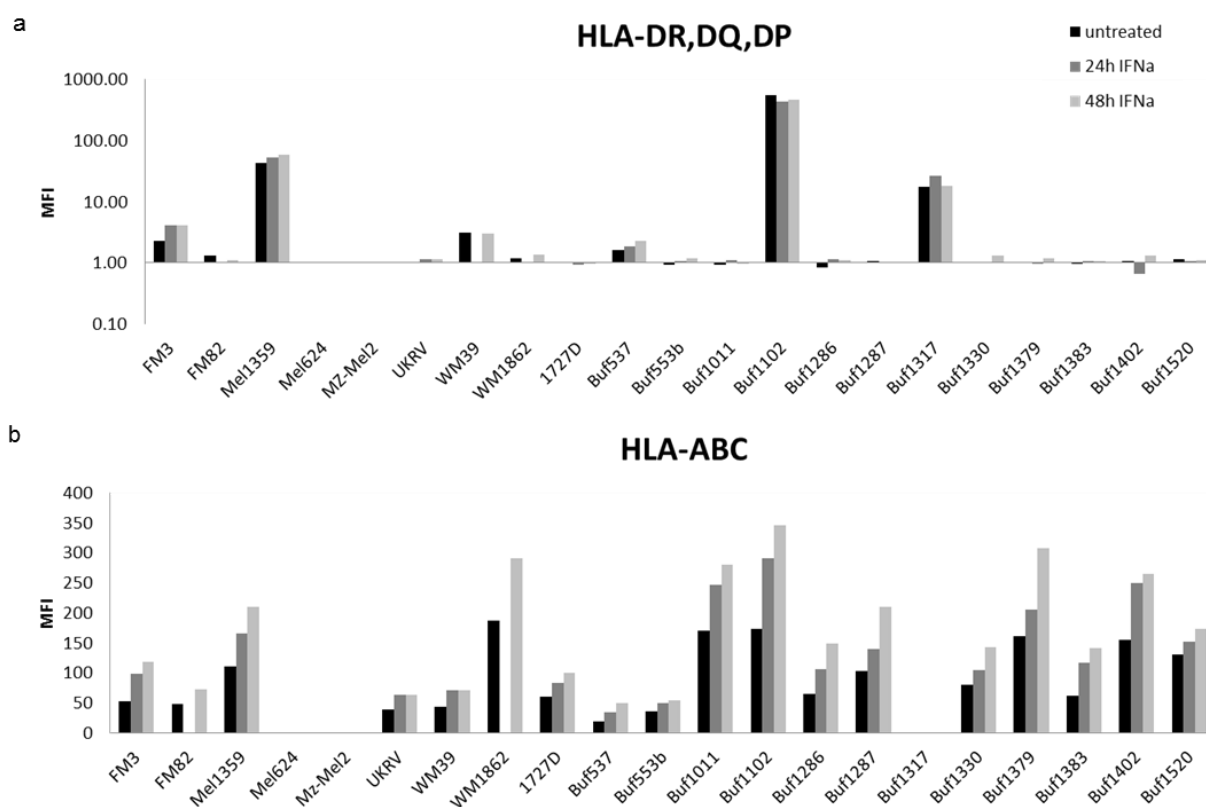

**Figure S2.** Lack of IFN- $\alpha$  inducibility of HLA class II, but not of HLA class I surface expression. Melanoma cells were left untreated or treated for 24 and 48 hrs with IFN- $\alpha$ , before flow cytometric analysis was performed using HLA class II (a) or HLA class I (b) specific antibodies, respectively. The results are presented as bar charts of relative MFI of HLA class II and class I setting the MFI of untreated cells as 1.

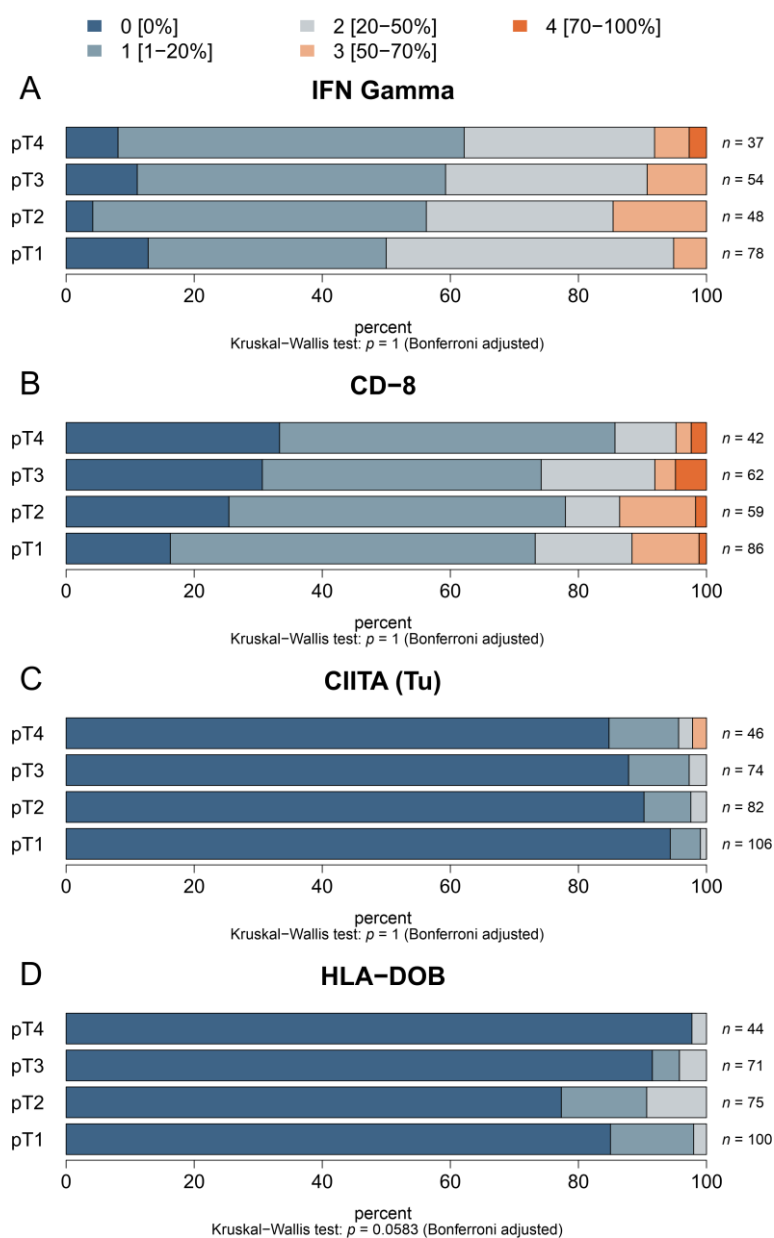

**Figure S3.** Correlation of the expression of (A) IFN- $\gamma$ , (B) CD8, (C) CIITA (tu) and (D) HLA-DOB to pT stages of melanoma samples and/or immune cells.
